# Supplementary material for: Targeted Positioning of Quantum Dots Inside 3D Silicon Photonic Crystals Revealed by Synchrotron X-ray Fluorescence Tomography
Source: PubMed Central journal article supplement (PMC8945387; doi:10.1021/acsnano.1c06915), 2022-02-21

# Supporting Information:

## Targeted positioning of quantum dots inside 3D silicon photonic crystals revealed by synchrotron X-ray fluorescence tomography

Andreas S. Schulz,<sup>†,‡,¶</sup> Cornelis A. M. Hartevelde,<sup>†</sup> G. Julius Vancso,<sup>¶</sup>  
Jurriaan Huskens,<sup>‡</sup> Peter Cloetens,<sup>\*,§</sup> and Willem L. Vos<sup>\*,†</sup>

<sup>†</sup>*Complex Photonic Systems (COPS), MESA+ Institute for Nanotechnology, University of Twente, P.O. Box 217, 7500 AE Enschede, The Netherlands*

<sup>‡</sup>*Molecular Nanofabrication (MNF), MESA+ Institute for Nanotechnology, University of Twente, P.O. Box 217, 7500 AE Enschede, The Netherlands*

<sup>¶</sup>*Materials Science and Technology of Polymers (MTP), MESA+ Institute for Nanotechnology, University of Twente, P.O. Box 217, 7500 AE Enschede, The Netherlands*

<sup>§</sup>*ESRF-The European Synchrotron, CS40220, 38043 Grenoble, France*

E-mail: cloetens@esrf.eu; w.l.vos@utwente.nl

## Supporting Information Available

This supplementary features 1) details of the chemical synthesis, 2) video animations of all slices of the three-dimensional (3D) data sets of various elements, 3) projection maps of several elements, 4) attenuation maps as an important correction step, and 5) 3D renderings of several elements.

# 1 Scheme of the chemical synthesis

The chemical synthesis is described in three parts: firstly, the attachment of the initiator to the silicon beam, secondly, the SI-ATRP of the poly(glycidyl methacrylate) brushes, and thirdly the coupling of the quantum dots, see scheme S1 below.

S1 Chemical synthesis 'S1\_scheme\_chemistry.pdf':

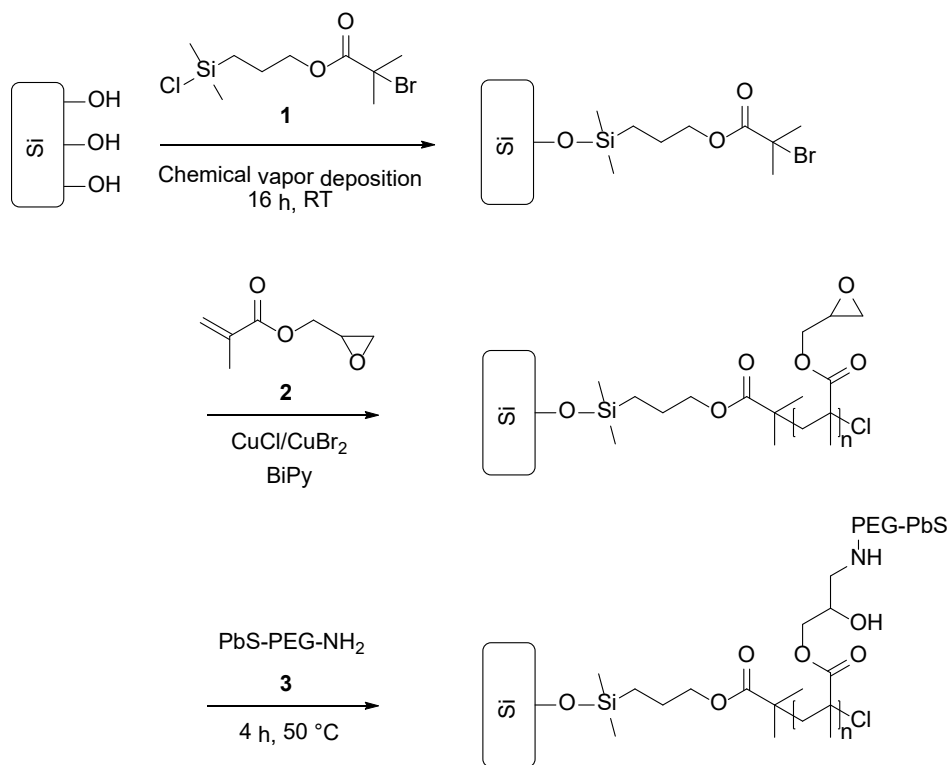

## 2 Multimedia Files

In view of the richness of the 3D reconstructions, we provide here movie animations of cross-sections through the 3D data volumes.

S2 Animation 'S2\_Ga-K\_xz.avi': Colour animation of all cross-sections for gallium, of which 2 slices are shown in Fig. 4A-B of the main manuscript. The animation shows

the 3D reconstructed sample volume for all cross-section for the  $XZ$ -direction. Below is a still at 0:03, where the label top left is the slice number (here 101) and the label top right shows the highest Ga density found in the entire slice.

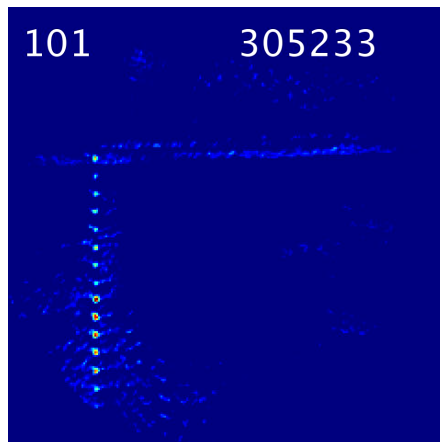

S3 Animation 'S3\_Br-K\_xz.avi': Colour animation of all cross-sections for bromide, of which 2 slices are shown in Fig. 4C-D of the main manuscript. The animation shows the 3D reconstructed sample volume for all cross-section for the  $XZ$ -direction. Below is a still at 0:03, where the label top left is the slice number (here 131) and the label top right shows the highest Br density in the entire slice.

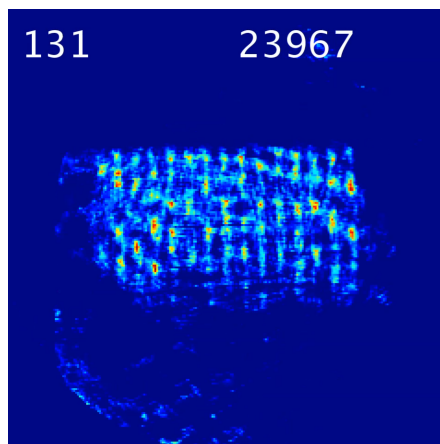

S4 Animation 'S4\_Pb-L\_xz.avi': Colour animation of all cross-sections for lead, of which 2 slices are shown in Fig. 4C-D of the main manuscript. The animation shows the 3D

reconstructed sample volume for all cross-section for the  $XZ$ -direction. Below is a still at 0:02, where the label top left is the slice number (here 70) and the label top right shows the highest Pb density found in the entire slice.

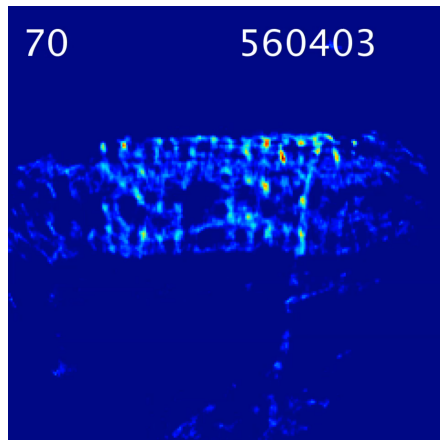

### 3 Projection maps

We present here projection maps for the elements gallium and bromine.

S5 Animation 'S5\_att\_cor\_Ga\_projections\_4in1.pdf':

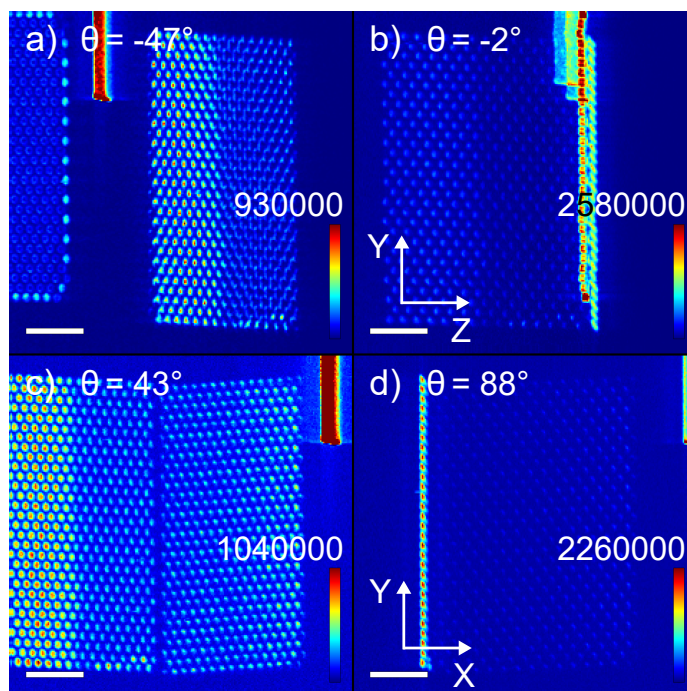

Two of these Ga projections are shown in the main manuscript as Fig. 3 (a,b).

S6 Animation 'S6\_att\_cor\_Br\_projections\_4in1.pdf':

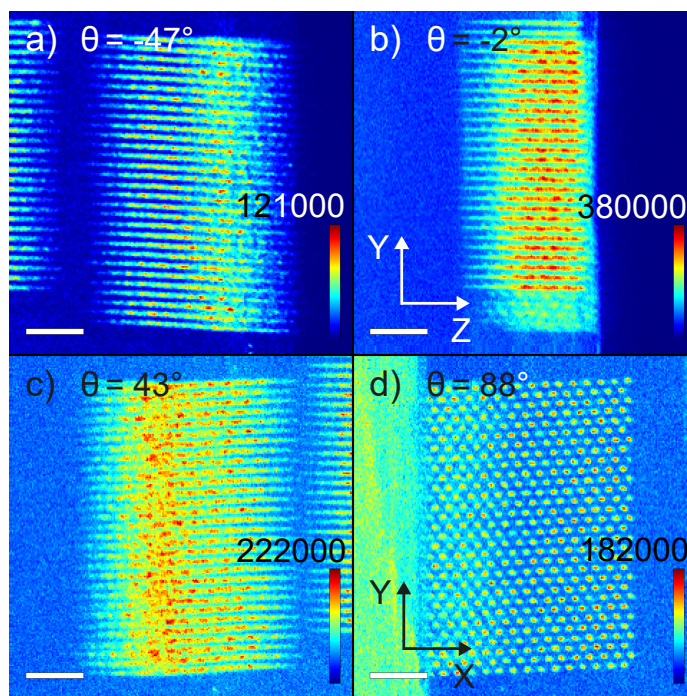

Two of these Br projections are shown in the main manuscript as Fig. 3 (c,d).

## 4 Attenuation maps

Here we present the attenuation maps for the elements gallium, bromine, copper, and chlorine.

S7 Animation 'S7\_att\_Ga\_4angles.pdf':

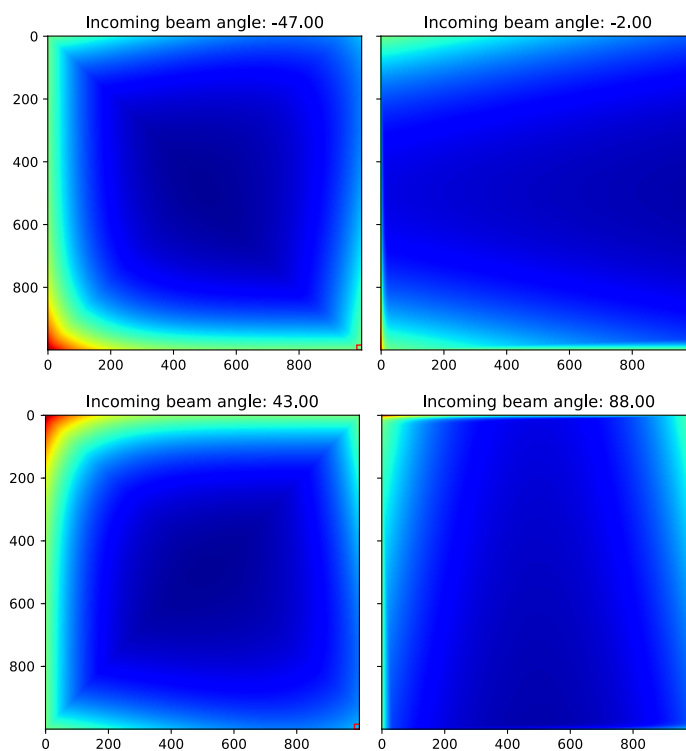

S8 Animation 'S8\_att\_Br\_4angles.pdf':

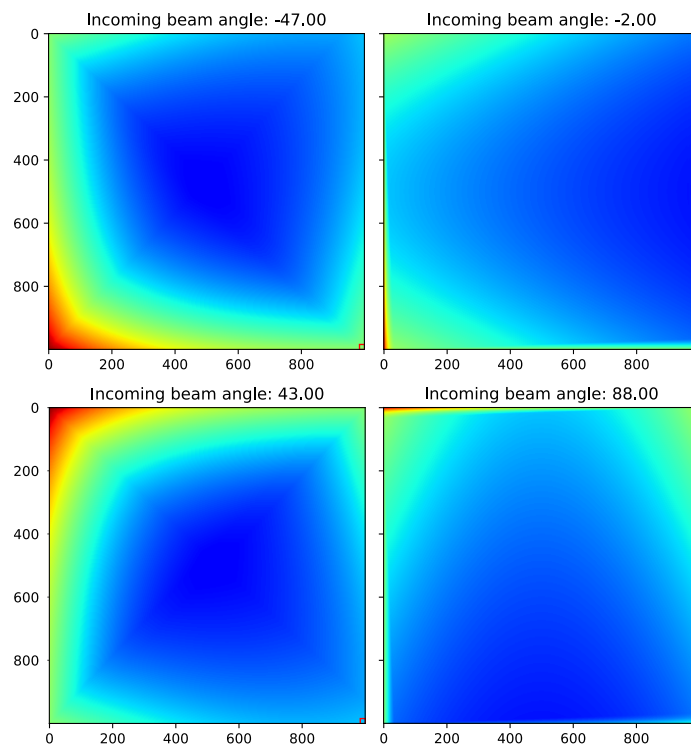

S9 Animation 'S9\_att\_Cu\_4angles.pdf':

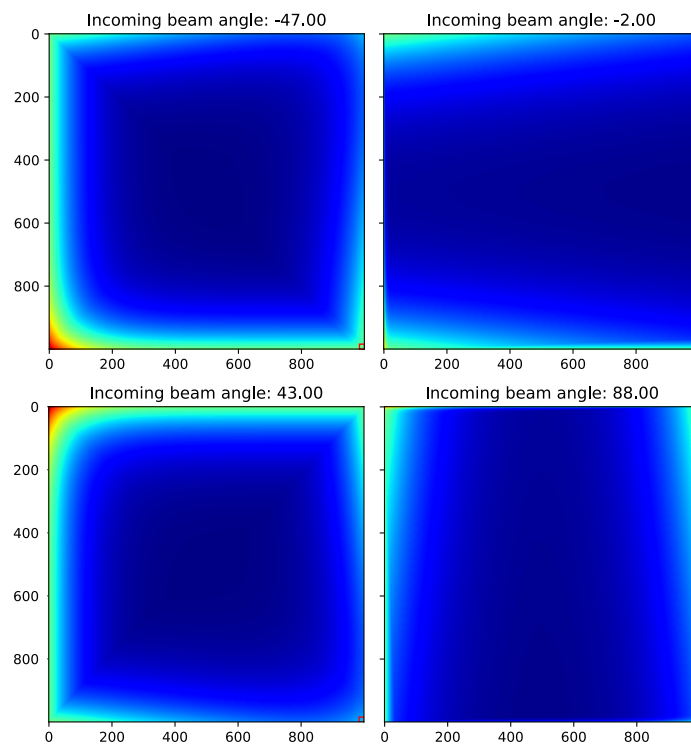

S10 Animation 'S10\_att\_CL4angles.pdf':

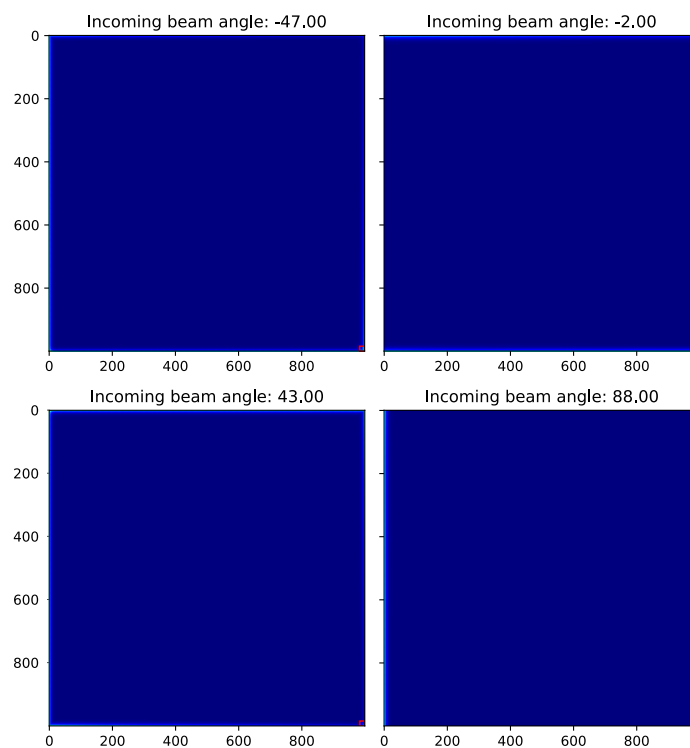

## 5 3D rendering

Here we present the 3D renderings for the elements gallium (light blue), bromine (yellow), and lead (red).

S11 Animation 'S11\_Ga\_cyan\_Br\_orange\_Pb\_red\_pores\_filled\_with\_sharp\_lines\_Pb.pdf':



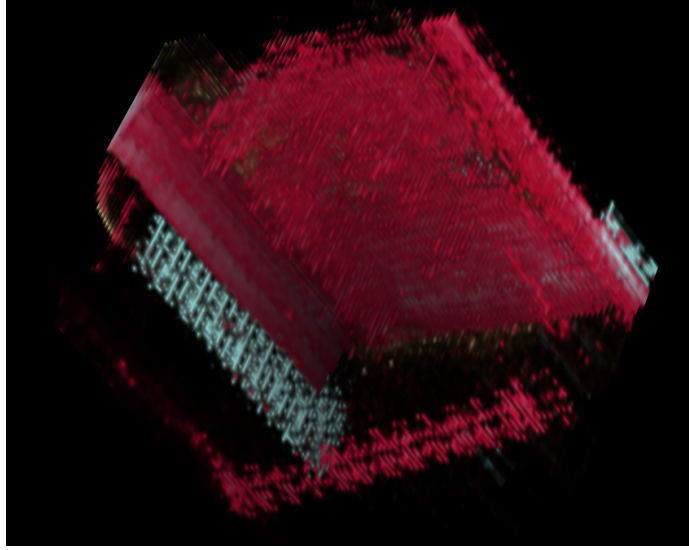

Supplement: nn1c06915_si_001.pdf [file nn1c06915_si_001.pdf]
